# Supplementary material for: De novo synthesis of fatty acids is regulated by FapR protein in Exiguobacterium antarcticum B7, a psychrotrophic bacterium isolated from Antarctica
Source: PubMed Central journal article supplement (PMC5028935; doi:10.1186/s13104-016-2250-9), 2016-09-20
Supplement: 13104_2016_2250_MOESM1_ESM.pdf [file 13104_2016_2250_MOESM1_ESM.pdf]

**Table S1.** Buffers used during each protein purification step.

| <b>Protein</b> | <b>Extraction buffer</b>                                                          | <b>HisTrap HP buffers</b> |                    | <b>Superdex 200</b>       | <b>Resource Q</b>                                    |
|----------------|-----------------------------------------------------------------------------------|---------------------------|--------------------|---------------------------|------------------------------------------------------|
|                |                                                                                   | Ligation                  | Elution 2          | <b>Xk26 buffer</b>        | <b>buffer</b>                                        |
| <b>FapR</b>    | Tris-HCl 20 mM, NaCl                                                              |                           |                    | Tris-HCl 50               | Ionic strength                                       |
|                | 500 mM, Imidazol 10<br>mM, protease inhibitor<br>(PMSF) 1 mM and<br>DNase I 1 mM. | Imidazol 30<br>mM         | Imidazol 500<br>mM | mM, NaCl 150<br>mM, pH7,6 | gradient of 20<br>mM to 600 mM of<br>Tris-HCl pH 7.6 |
